# Supplementary material for: Strain-Specific Differences in the Genetic Control of Two Closely Related Mycobacteria
Source: PLOS journal article supplement (doi:10.1371/journal.ppat.1001169), 2010-10-28
Supplement: S1 (10.1371/journal.ppat.1001169.s001) [file journal.ppat.1001169.s001]

## Supplement 1. Methods.

**Estimation.** Without loss of generality, here we describe the estimation for the mixed model

$$\mathbf{y} = \mathbf{X}\mathbf{b} + \mathbf{Z}\mathbf{u} + \mathbf{e}$$

where  $\mathbf{X}$ ,  $\mathbf{Z}$  are known matrices,  $\mathbf{b}$  is an unknown fixed vector and  $\mathbf{u}$  and  $\mathbf{e}$  are random vectors with null mean and variance  $s_u^2 \mathbf{G}$  and  $s^2 \mathbf{I}$ , respectively. Thus

$$E(\mathbf{y}) = \mathbf{X}\mathbf{b} \quad \text{and} \quad \text{Var}(\mathbf{y}) = s^2 (\mathbf{Z}\mathbf{H}\mathbf{Z}' + \mathbf{I}) = s^2 \mathbf{Q}$$

with  $\mathbf{H} = k^{-1}\mathbf{G}$  and  $k = \frac{s^2}{s_u^2}$ . Given  $\mathbf{H}$ , the best linear estimator of  $\mathbf{b}$  and predictor of  $\mathbf{u}$  can be written as

$$\hat{\mathbf{b}} = (\mathbf{W}'\mathbf{W})^{-1}\mathbf{W}'\mathbf{v} \quad \text{and} \quad \hat{\mathbf{u}} = \mathbf{H}\mathbf{Z}'\mathbf{Q}^{-\frac{1}{2}}(\mathbf{v} - \mathbf{W}\hat{\mathbf{b}}),$$

respectively, where

$$\mathbf{W} = \mathbf{Q}^{-\frac{1}{2}}\mathbf{X} \quad \text{and} \quad \mathbf{v} = \mathbf{Q}^{-\frac{1}{2}}\mathbf{y}.$$

Also

$$\hat{s}^2 = \frac{1}{N - r(\mathbf{W})}(\mathbf{v} - \mathbf{W}\hat{\mathbf{b}})'(\mathbf{v} - \mathbf{W}\hat{\mathbf{b}})$$

$$\hat{s}_u^2 = \frac{1}{r(\mathbf{H})} (\hat{\mathbf{u}}'\mathbf{H}^{-1}\hat{\mathbf{u}} + \hat{s}^2 \text{tr}(\mathbf{H}^{-1}\mathbf{C}))$$

with

$$\mathbf{C} = (\mathbf{Z}'\mathbf{M}\mathbf{Z} + \mathbf{H}^{-1})^{-1} \quad \text{and} \quad \mathbf{M} = \mathbf{I} - \mathbf{X}(\mathbf{X}'\mathbf{X})^{-1}\mathbf{X}.$$

The estimation procedure runs as follows: get a starting value for  $k$  and iterate through these equations until convergence is reached.

**Bootstrap.** When  $\mathbf{b}$  and  $k$  are known, it follows from the model reduced under the null hypothesis that  $E(\mathbf{v}) = \mathbf{W}\mathbf{b}$  and  $\text{Var}(\mathbf{v}) = s^2 \mathbf{I}$ , thus the distribution of vector of residuals,  $\mathbf{r} = \mathbf{v} - \mathbf{W}\mathbf{b}$ , is exchangeable, which means that a resampling procedure based upon the residuals will have good asymptotic properties. This suggests the following semi-parametric bootstrap procedure: i) given  $\hat{k}$  and  $\hat{\mathbf{b}}$  obtained under the mixed model without a major gene, i.e., under the null hypothesis, compute  $\hat{\mathbf{r}} = \mathbf{D}(\mathbf{v} - \mathbf{W}\hat{\mathbf{b}})$  where  $\mathbf{D}$  is a diagonal matrix with each of the non-zero elements given by  $(1 - l_{ii})^{-1}$  and  $l_{ii}$  being the  $i$ th the leverage coefficient; ii) with replacement, resample from  $\hat{\mathbf{r}}$  to obtain  $\mathbf{r}^*$  and construct the pseudo-observation as  $\mathbf{v}^* = \mathbf{W}\hat{\mathbf{b}} + \mathbf{r}^*$ .

**Testing.** Obtain the genome-wide corrected empirical p-values by the following procedure: i) at each marker position, fit the major gene model

$$\mathbf{v} = \mathbf{W}\mathbf{b} + \mathbf{q}'_m g_m + \mathbf{r}$$

where  $\mathbf{q}'_m = \mathbf{Q}^{-\frac{1}{2}}\mathbf{q}_m$  (of course, this transformed model is completely equivalent to the one described in the text) and estimate the model parameters with the mixed model procedure outlined above; ii) compute  $\mathbf{t}_m$ , the vector whose  $m$ -th entry is the  $t$ -statistic, i.e.,  $t_m = \frac{|\hat{g}_m|}{\hat{s}_{\hat{g}_m}}$ ; iii) draw a pseudo-observation  $\mathbf{v}^*$  by using the previous resampling scheme and fit the major gene model in (i) with  $\mathbf{v}$  replaced by  $\mathbf{v}^*$  to obtain a pseudo-statistic vector  $\mathbf{t}_m^*$  as well as its associated critical value  $t_c^* = \max \mathbf{t}_m^*$ ; iv) for each  $t_m$  in  $\mathbf{t}_m$ , if  $t_m \leq t_c^*$ , update the  $m$ -th rejection count by adding an unit. v) Repeat the steps (iii)-(iv)  $B$  times and compute the estimates of p-values by dividing the rejection count vector by  $B$ .
